# Supplementary material for: Comparative transcriptome analysis between planarian Dugesia japonica and other platyhelminth species
Source: PubMed Central journal article supplement (PMC3507646; doi:10.1186/1471-2164-13-289), 2012-06-29
Supplement: 1471-2164-13-289-S2.pdf [file 1471-2164-13-289-S2.pdf]

#### Additional file 4. Examples of high-substitution proteins between *D. japonica* and *S. mediterranea*

| KOG Functions                                                | <i>D. japonica</i> Unigenes      | KOG Description                                                                                |
|--------------------------------------------------------------|----------------------------------|------------------------------------------------------------------------------------------------|
| Secondary metabolites biosynthesis, transport and catabolism | Dj_CL1786_001_b2                 | Glutathione synthetase                                                                         |
|                                                              | Dj_aH_000_04635HH.full           | Amine oxidase                                                                                  |
|                                                              | Dj_aH_323_113.rev                | Transporter, ABC superfamily                                                                   |
|                                                              | Dj_CL0815_001_b2                 | Pristanoyl-CoA/acyl-CoA oxidase                                                                |
|                                                              | Dj_CL0185_004_b2                 | Cytochrome P450 CYP2 subfamily                                                                 |
|                                                              | Dj_aH_516_K24.double             | Cytochrome P450 CYP3/CYP5/CYP6/CYP9 subfamilies                                                |
| Defense mechanisms                                           | Dj_aH_528_M20.rev                | Hydroxysteroid 17-beta dehydrogenase 11                                                        |
|                                                              | Dj_aH_306_H01                    | Dual specificity phosphatase                                                                   |
| Lipid transport and metabolism                               | Dj_CL2549_001_b2                 | B-cell receptor-associated protein and related proteins                                        |
|                                                              | Dj_CL1026_001_b2                 | Serpin                                                                                         |
|                                                              | Dj_CL3487_001_b2                 | Complement component 1, Q subcomponent binding protein/mRNA splicing factor SF2, subunit P32   |
|                                                              | Dj_CL0815_001_b2                 | Pristanoyl-CoA/acyl-CoA oxidase                                                                |
|                                                              | Dj_CL1029_001_b2                 | Very-long-chain acyl-CoA dehydrogenase                                                         |
|                                                              | Dj_CL4018_001_b2                 | Lysophosphatidic acid acyltransferase endophilin/SH3GL, involved in synaptic vesicle formation |
|                                                              | Dj_aH_000_04081HH.rev            | Acyl-CoA synthetase                                                                            |
|                                                              | Dj_aH_501_N03.rev                | Amidases                                                                                       |
|                                                              | Dj_CL0322_001_b2                 | Long-chain acyl-CoA synthetases (AMP-forming)                                                  |
|                                                              | Dj_aH_109112_E24                 | Hydroxymethylglutaryl-CoA synthase                                                             |
|                                                              | Dj_CL1430_001_b2                 | Phosphatidylinositol transfer protein SEC14 and related proteins                               |
|                                                              | Dj_CL0981_001_b2                 | Mevalonate kinase MVK/ERG12                                                                    |
|                                                              | Dj_CL4218_001_b2                 | Enoyl-CoA isomerase                                                                            |
|                                                              | Dj_CL1268_001_b2                 | Triglyceride lipase-cholesterol esterase                                                       |
|                                                              | Dj_aH_226_J12                    | Predicted undecaprenyl diphosphate synthase                                                    |
|                                                              | Dj_CL3958_001_b2                 | Lipid phosphate phosphatase and related enzymes of the PAP2 family                             |
|                                                              | Dj_CL3075_001_b2                 | Phospholipase                                                                                  |
| Dj_CL0940_001_b2                                             | Carnitine O-acyltransferase CRAT |                                                                                                |
| Dj_CL2702_001_b2                                             | Soluble epoxide hydrolase        |                                                                                                |
| Nucleotide transport and metabolism                          | Dj_CL1377_001_b2                 | Glutamine phosphoribosylpyrophosphate amidotransferase                                         |
|                                                              | Dj_aH_325_K24.rev                | Ribonucleotide reductase, alpha subunit                                                        |
|                                                              | Dj_aH_304_D04.double             | Nucleoside phosphatase                                                                         |
|                                                              | Dj_CL2998_001_b2                 | Nucleoside transporter                                                                         |
|                                                              | Dj_aH_000_00767HH.rev            | Phosphoribosylformylglycinamide synthase                                                       |
|                                                              | Dj_aH_222_B06                    | Adenylate kinase                                                                               |
|                                                              | Dj_aH_522_G08.double             | Uridylate kinase/adenylate kinase                                                              |
|                                                              | Dj_aH_530_A09                    | Concentrative Na <sup>+</sup> -nucleoside cotransporter CNT1/CNT2                              |
| Dj_aH_311_H05.double                                         | Purine nucleoside phosphorylase  |                                                                                                |
| Amino acid transport and metabolism                          | Dj_CL0221_001_b2                 | Puromycin-sensitive aminopeptidase and related aminopeptidases                                 |
|                                                              | Dj_CL2253_001_b2                 | Threonine/serine dehydratases                                                                  |
|                                                              | Dj_CL1143_001_b2                 | Amino acid transporters                                                                        |
|                                                              | Dj_aH_522_K10                    | 4-aminobutyrate aminotransferase                                                               |
|                                                              | Dj_aH_529_E12.double             | Gamma-glutamyltransferase                                                                      |
|                                                              | Dj_CL1574_001_b2                 | Glycine/serine hydroxymethyltransferase                                                        |
|                                                              | Dj_CL0108_001_b2                 | Trypsin                                                                                        |
|                                                              | Dj_CL1182_001_b2                 | D-aspartate oxidase                                                                            |
|                                                              | Dj_CL0627_001_b2                 | Dihydropteridine reductase DHPR/QDPR                                                           |
| Dj_CL3658_001_b2                                             | Kynurenine formamidase           |                                                                                                |
