# Supplementary material for: Comparative transcriptome analysis between planarian Dugesia japonica and other platyhelminth species
Source: PubMed Central journal article supplement (PMC3507646; doi:10.1186/1471-2164-13-289), 2012-06-29
Supplement: 1471-2164-13-289-S3.pdf [file 1471-2164-13-289-S3.pdf]

## Additional file 2. Alignment of *D. japonica* and *S. mediterranea* PIWI2

*D. japonica* PIWI2 [EST: Dj\_CL0040\_001\_b2]

*S. mediterranea* PIWI2 [Swiss-Prot: Q2Q5Y8]

### Protein Alignment

Identical rate of amino acids = 93.6%

Identical and homologous substitution rate of amino acids = 98.4%

|             |            |            |        |          |            |             |        |                                |                       |
|-------------|------------|------------|--------|----------|------------|-------------|--------|--------------------------------|-----------------------|
|             |            |            | 20     |          | 40         |             | 60     |                                |                       |
| PIWI2_DUGJA | M-----AK   | LE         | TNGSEN | RG       | R-GNRGGLRR | TFRIVEPNLQ  | PAEII  | EKTGN IGRTVKLQSN 52            |                       |
| PIWI2_SCHMD | MEEIPVKVAK | LE         | ANGSET | RG       | KMGNGRGLRG | TFRIVEPNLQ  | PADITE | EKTGN IGRTVKLQSN 60            |                       |
|             |            |            | 80     |          | 100        |             | 120    |                                |                       |
| PIWI2_DUGJA | FTKFSVLRSE | KFMMYDSVF  | T      | QVG      | IPPVKVKL   | QFIVRVCQEN  | RLPGAF | CFDG RRLFTSEKWH 112            |                       |
| PIWI2_SCHMD | FTKFSVLRSE | KFMMYDSVFS |        | QVGL     | SPKVKL     | QFIVRVCQEN  | KLPGAF | CFDG RRLFTSEKWH 120            |                       |
|             |            |            | 140    |          | 160        |             | 180    |                                |                       |
| PIWI2_DUGJA | GESDIQEF   | TY         | DD     | KKMTLRLV | ATILPETEEY | YQMINVLLNN  | LQIMM  | GQERI GKGYFLSPNI 172           |                       |
| PIWI2_SCHMD | GESDIQEF   | SH         | DE     | KKMTLRLV | STILPETEEY | YQMINVLLNN  | LQVML  | GQERI GKGYFLSPNI 180           |                       |
|             |            |            | 200    |          | 220        |             | 240    |                                |                       |
| PIWI2_DUGJA | TKDEVPRNSG | PTFFETNSFK | VLGGFG | TTLQ     | RGTKPTGELT | TLLYIERINR  | VLNDNS | VMKKA 232                      |                       |
| PIWI2_SCHMD | TKDEVPRNSG | PTFFETNSFK | VLGGFG | TTLQ     | RGTKPTGELT | TLLYIERINR  | VLNDNS | VMKKA 240                      |                       |
|             |            |            | 260    |          | 280        |             | 300    |                                |                       |
| PIWI2_DUGJA | YNRRSIDQLI | GRDII      | TKYNN  | KTYRI    | SEIKE      | MSVDEK      | FEMS   | GRTLSYAEY KDRYNIRLSQ 292       |                       |
| PIWI2_SCHMD | YNRRSIDQLI | GRDII      | TKYNN  | KTYRI    | SEIKE      | MNVDEK      | FEMG   | GRTLSYAEY KERYNIRLTQ 300       |                       |
|             |            |            | 320    |          | 340        |             | 360    |                                |                       |
| PIWI2_DUGJA | GDQPFVLTRV | KKPMR      | RERK   | PG       | EEDKEKDK   | EKEKEKEKEA  | PQDKDM | TLNI PGELCFLCGF 352            |                       |
| PIWI2_SCHMD | GDQPFVLTRV | KKPMR      | RERK   | KD       | EEGVEK--   | -----EKEKEA | PEEKDM | TLNI PGELCFLCGF 354            |                       |
|             |            |            | 380    |          | 400        |             | 420    |                                |                       |
| PIWI2_DUGJA | SDQEKSNDL  | QKSL       | GSVLKR | EPRER    | LDDIP      | AFCNWI      | KSSD   | NANGMCNKWQ LKIENKPLEI 412      |                       |
| PIWI2_SCHMD | SDQEKSNDL  | QKNL       | GSVLKR | EPRER    | LDDIP      | AYCNWI      | KNSD   | AATGMCNKWQ LKIDNKPLEI 414      |                       |
|             |            |            | 440    |          | 460        |             | 480    |                                |                       |
| PIWI2_DUGJA | EGRELPPCDV | ISGNN      | KINEK  | IP       | DDWKFRV    | QFDIKRDRKH  | EIDVVI | DRN DFQYKNFMSD 472             |                       |
| PIWI2_SCHMD | EGRELPPCDV | ISGGS      | KINEK  | MG       | DDWKFRV    | QFDIKRDRKH  | EIDVVI | DRN DFQYKNFMND 474             |                       |
|             |            |            | 500    |          | 520        |             | 540    |                                |                       |
| PIWI2_DUGJA | VEQELRNMRI | DARVGK     | VNTC   | GPND     | VERCLN     | DAARSG      | SGCA   | KMALVFVPDD RVYAKVKSFT 532      |                       |
| PIWI2_SCHMD | VEQELRNMRI | DARVGK     | VNTC   | GPND     | VERCLN     | DAARSG      | SGCA   | KMALVFVPDD RVYAKVKSFT 534      |                       |
|             |            |            | 560    |          | 580        |             | 600    |                                |                       |
| PIWI2_DUGJA | MSTGLLTQCV | TTRNGT     | NRND   | KRRKV    | VSNKT      | VMQIFAK     | FGY    | DPWTVEIKLR PTMIVGMDTY 592      |                       |
| PIWI2_SCHMD | MSTGLLTQCV | TTRNGT     | NRND   | KRRKV    | VSSKT      | VMQIFAK     | FGY    | DPWTVEIKLR PTMIVGMDTY 594      |                       |
|             |            |            | 620    |          | 640        |             | 660    |                                |                       |
| PIWI2_DUGJA | HNKSSKKS   | IQ         | ASVFS  | INSTF    | TQYMSFV    | NQ-         | PKGRQE | FHET LGKNFNLALE DFKKRYDILP 651 |                       |
| PIWI2_SCHMD | HNKSSKKS   | IQ         | ASVFS  | INSTF    | TQYMSFV    | VNS         | PKGRQE | FHET LGKNFNLALE DFKKRYDILP 654 |                       |
|             |            |            | 680    |          | 700        |             | 720    |                                |                       |
| PIWI2_DUGJA | QRILVFRDGV | GDNQL      | QFTKN  | FEVDAM   | KPLI       | ENIYK       | SNGFP  | VPQIIYVIVK KRVGTKLFNR 711      |                       |
| PIWI2_SCHMD | QRILVFRDGV | GDNQL      | QFTKN  | FEVDAM   | KPLI       | ENIYK       | GNGFP  | VPQIIYVIVK KRVGTKLFNR 714      |                       |
|             |            |            | 740    |          | 760        |             | 780    |                                |                       |
| PIWI2_DUGJA | GNNPNPGTVV | DKEIV      | KPNFY  | EFFLVS   | QRRT       | KGTATPT     | NYN    | VLEDTRLLTK KGTMDPMAPN 771      |                       |
| PIWI2_SCHMD | GNNPNPGTVV | DKEIV      | KPNFY  | EFFLVS   | QRRT       | KGTATPT     | NYN    | VLEDTRLLTK KGTMDPMAPN 774      |                       |
|             |            |            | 800    |          | 820        |             |        |                                |                       |
| PIWI2_DUGJA | ELQKITYALT | HLFY       | NWMTI  | RVPVP    | VHYAH      | RLAELV      | GKVH   | KGN                            | SPAVINE RIRNRLFYL 830 |
| PIWI2_SCHMD | ELQKITYALT | HLFY       | NWMTI  | RVPVP    | VHYAH      | RLAELV      | GKVH   | KGS                            | NPVAINE RIRNRLFYL 833 |

Nucleotide Alignment

Identical rate of nucleotides = 79.7%

|             |             |              |             |             |             |             |       |  |
|-------------|-------------|--------------|-------------|-------------|-------------|-------------|-------|--|
|             |             |              | 20          |             | 40          |             | 60    |  |
| PIWI2_DUGJA | ATG-----    | -----        | -----GCTAAG | TTAGAAACGA  | ATGGCAGTGA  | AAATAGAGGA  | 39    |  |
| PIWI2_SCHMD | ATGGAGGAAA  | TACCAGTAAA   | AGTAGCTAAA  | CTTGAAGCGA  | ATGGAAGTGA  | AAACAAGAGGT | 60    |  |
|             |             |              | 80          |             | 100         |             | 120   |  |
| PIWI2_DUGJA | AGA--GGAA   | ATCGCGGTGG   | CTTACGTAGA  | ACTTTCAGAA  | TCGTAGAGCC  | CAATCTCAA   | 96    |  |
| PIWI2_SCHMD | AAAATGGGAA  | ATCGTGGTGG   | CCTGAGAGGA  | ACATTAGAA   | TTGTTGAACC  | TAACCTTGCAA | 120   |  |
|             |             |              | 140         |             | 160         |             | 180   |  |
| PIWI2_DUGJA | CCGGCTGAAA  | TTATAGAAA    | AACTGGAAAC  | ATAGGTAGAA  | CCGTCAAACT  | TCAATCCAAT  | 156   |  |
| PIWI2_SCHMD | CTTGCTGATA  | TCACTGAGAA   | AACAGGAAAC  | ATAGGAAGAA  | CAGTTAAATT  | ACAATCCAAT  | 180   |  |
|             |             |              | 200         |             | 220         |             | 240   |  |
| PIWI2_DUGJA | TTACCAAAT   | TTTCTGTGT    | ACGATCCGAA  | AAATTCATGA  | TGTATGATTC  | TGTTTTTACA  | 216   |  |
| PIWI2_SCHMD | TTTACCAAAT  | TTTCTGTTTT   | CGGTTTCAGAA | AAGTTCATGA  | TGTATGATTC  | CGTGTTTTCT  | 240   |  |
|             |             |              | 260         |             | 280         |             | 300   |  |
| PIWI2_DUGJA | CAAGTTGGAA  | TTCCACCAAAA  | AGTCAAACCTC | CAATTTATTG  | TTAGAGTTTG  | CCAAGAAAAT  | 276   |  |
| PIWI2_SCHMD | CAAGTTGGTT  | TGTCACCCAA   | AGTAAAATTA  | CAGTTTATTG  | TTCGAGTCTG  | CCAAGAAAAT  | 300   |  |
|             |             |              | 320         |             | 340         |             | 360   |  |
| PIWI2_DUGJA | AGGTTACCTG  | GAGCTTTTTG   | TTTCGATGGA  | AGACGATTGT  | TTACAAGTGA  | GAAGTGGCAT  | 336   |  |
| PIWI2_SCHMD | AAATTGCCAG  | GGCTTTTTTG   | TTTTGATGGA  | AGACGTCTAT  | TTACTAGTGA  | AAAATGGCAT  | 360   |  |
|             |             |              | 380         |             | 400         |             | 420   |  |
| PIWI2_DUGJA | GGCGAATCTG  | ATATTCAAGA   | GTTTACCTAC  | GACGATAAAA  | AAATGACCTT  | ACGATTAGTT  | 396   |  |
| PIWI2_SCHMD | GGAGAATCGG  | ACATTCAAGA   | ATTTAGTCAT  | GATGAAAAAA  | AAATGACACT  | AAGATTGGTA  | 420   |  |
|             |             |              | 440         |             | 460         |             | 480   |  |
| PIWI2_DUGJA | GCGACCATTTC | TTCCAGAAAC   | AGAAGAATAT  | TATCAAATGA  | TAAACGTCTT  | ATTGAACAAC  | 456   |  |
| PIWI2_SCHMD | TCAACTATCC  | TTCCTGAAAC   | TGAAGAATAT  | TACCAAATGA  | TCAATGTATT  | ACTCAATAAT  | 480   |  |
|             |             |              | 500         |             | 520         |             | 540   |  |
| PIWI2_DUGJA | TTACAAATAA  | TGATGGGCCA   | AGAGCGAATT  | GGAAAAGGTT  | ACTTTTTAAG  | TCCCAATATA  | 516   |  |
| PIWI2_SCHMD | TTACAAGTAA  | TGTTAGGTCA   | AGAAGAATT   | GGTAAAGGTT  | ATTTTTTAAG  | CCCAATATT   | 540   |  |
|             |             |              | 560         |             | 580         |             | 600   |  |
| PIWI2_DUGJA | ACAAAAGACG  | AAGTTCCCTCG  | CAATAGTGGT  | CCGACATTCT  | TTGAAACGAA  | TAGTTTTAAA  | 576   |  |
| PIWI2_SCHMD | ACAAAAGATG  | AAGTTCCCCG   | AAATTCCTGA  | CCGACATTTT  | TTGAAACCAA  | TAGTTTTAAA  | 600   |  |
|             |             |              | 620         |             | 640         |             | 660   |  |
| PIWI2_DUGJA | GTATTAGGAG  | GATTTGGTAC   | GACACTACAG  | AGAGGCACAA  | AGCCTACTGG  | GGAACCTAACG | 636   |  |
| PIWI2_SCHMD | GTCTTGGGG   | GCTTTGGTAC   | AACTTTACAA  | AGAGGCACAA  | AACCAACTGG  | TGAATTAACG  | 660   |  |
|             |             |              | 680         |             | 700         |             | 720   |  |
| PIWI2_DUGJA | ACATTGCTCT  | ACATTGAGAG   | AATCAACAGA  | GTTCTAAATG  | ATAATTTCAGT | CATGAAAGCC  | 696   |  |
| PIWI2_SCHMD | ACTCTTTTAT  | ATATTGAGCG   | TATTAACAGA  | GTATTAACCG  | ATAACTCTGT  | TATGAAGGCA  | 720   |  |
|             |             |              | 740         |             | 760         |             | 780   |  |
| PIWI2_DUGJA | TATAATCGTC  | GAAGTATTGA   | TCAATTAATC  | GGACGAGACA  | TTATAACCAA  | ATACAACAAC  | 756   |  |
| PIWI2_SCHMD | TACAACAGAA  | GAAGTATTGA   | TCAGTTGATA  | GGCAGAGATA  | TCATAACAAA  | ATATAATAAC  | 780   |  |
|             |             |              | 800         |             | 820         |             | 840   |  |
| PIWI2_DUGJA | AAGACCTATA  | GAAATTTCCGA  | AATTAAGAA   | ATGAGCGTAG  | ATGAGAAATT  | TGAAATGTCA  | 816   |  |
| PIWI2_SCHMD | AAAACITATA  | GGATAAGTGA   | AATTAAGAA   | ATGAAACGTAG | ATGAGAAATT  | TGAAATGGGT  | 840   |  |
|             |             |              | 860         |             | 880         |             | 900   |  |
| PIWI2_DUGJA | GGAAGAACAT  | TATCTTATGC   | CGAATATTTT  | AAAGATCGAT  | ATAACATTTCG | ATTATCTCAA  | 876   |  |
| PIWI2_SCHMD | GGTAGAACIT  | TATCGTATGC   | CGAATATTTT  | AAGGAACGAT  | ATAATATTTCG | ATTAACCTCAA | 900   |  |
|             |             |              | 920         |             | 940         |             | 960   |  |
| PIWI2_DUGJA | GGTGACCAAC  | CATTTGTATT   | GACAAGAGTT  | AAAAAACCAA  | TGCGCCGTGA  | GAGAAGAAAG  | 936   |  |
| PIWI2_SCHMD | GGCGATCAAC  | CATTTGTCTT   | AACGCGAGTG  | AAGAAACCAA  | TGCGTCGAGA  | AAGAAAGAAA  | 960   |  |
|             |             |              | 980         |             | 1,000       |             | 1,020 |  |
| PIWI2_DUGJA | CCAGGAGAAG  | AAGACAAAAG   | AAAGGATAAA  | GAGAAAGAAA  | AAGAGAAAGA  | GAAAGAAGCC  | 996   |  |
| PIWI2_SCHMD | AAAGACGAAG  | AAGGAGTGA    | AAAA-----   | -----       | --GAGAAAGA  | AAAAGAGGCT  | 1002  |  |
|             |             |              | 1,040       |             | 1,060       |             | 1,080 |  |
| PIWI2_DUGJA | CCTCAGGATA  | AAGATATGAC   | ATTGAATATT  | CCTGGAGAA   | TGTGTTTCTT  | ATGTGGATT   | 1056  |  |
| PIWI2_SCHMD | CCAGAAGAGA  | AGGACATGAC   | TCTCAATATT  | CCTGGAGAG   | TGTGTTTCTT  | ATGTGGGTT   | 1062  |  |
|             |             |              | 1,100       |             | 1,120       |             | 1,140 |  |
| PIWI2_DUGJA | TCAGATCAAG  | AAAAATCTAA   | TATGGATCTC  | CAAAAGAGCT  | TAGGAAGTGT  | ATTAATAAAGA | 1116  |  |
| PIWI2_SCHMD | TCAGATCAAG  | AGAAATCGAA   | TATGGATCTG  | CAGAAGAATT  | TAGGTTGTGT  | TTTAATAAAGA | 1122  |  |
|             |             |              | 1,160       |             | 1,180       |             | 1,200 |  |
| PIWI2_DUGJA | GAGCCACGTG  | AAAGACTTGA   | TGACATTCTT  | GCATTCTGCA  | ATTGGATTAA  | AAGTAGCGAT  | 1176  |  |
| PIWI2_SCHMD | GAGCCACGTG  | AAAGATTGGA   | TGATATACCA  | GCTTATTGTA  | ACTGGATTAA  | AAATAGTGAT  | 1182  |  |
|             |             |              | 1,220       |             | 1,240       |             | 1,260 |  |
| PIWI2_DUGJA | AATGCTAATG  | GAATGTGCAA   | TAAGTGGCAA  | TTAAAGATTG  | AAAAATAACC  | CCTCGAAATT  | 1236  |  |
| PIWI2_SCHMD | GCGGCAACTG  | GAATGTGCAA   | TAAATGGCAG  | CTGAAAATAG  | ATAACAAACC  | ATTAGAAATC  | 1242  |  |
|             |             |              | 1,280       |             | 1,300       |             | 1,320 |  |
| PIWI2_DUGJA | GAGGGCAGGG  | AGTTGCCGCC   | ATGTGATGTT  | ATTAGCGGTA  | ATAATAAAAT  | CAACGAGAAG  | 1296  |  |
| PIWI2_SCHMD | GAAGGTAGAG  | AAATTAACCTCC | ATGCGATGTA  | ATAAGTGGTG  | GCAGCAAAAT  | TAATGAAAAA  | 1302  |  |

|             |            |              |             |             |             |             |      |
|-------------|------------|--------------|-------------|-------------|-------------|-------------|------|
|             |            | 1,340        |             | 1,360       |             | 1,380       |      |
| PIWI2_DUGJA | ATTCCTGATG | ATTGAAAATT   | TGGAAGAGTT  | CAGTTTGATA  | TAAAAAGAGA  | CCGTAAACAT  | 1356 |
| PIWI2_SCHMD | ATGGGAGATG | ATTGAAAATT   | TGGTCGAGTT  | CAATTTGATA  | TTAAGCGTGA  | TCGTAAAGCAT | 1362 |
|             |            | 1,400        |             | 1,420       |             | 1,440       |      |
| PIWI2_DUGJA | GAAATGATG  | TAGTTATCGT   | CGATAGAAAT  | GATTTCCAGT  | ATAAAAATTT  | CATGAGTGAC  | 1416 |
| PIWI2_SCHMD | GAAATCGATG | TGGTCATCGT   | TGATCGAAAT  | GACTTTCAGT  | ATAAAAATTT  | TATGAATGAT  | 1422 |
|             |            | 1,460        |             | 1,480       |             | 1,500       |      |
| PIWI2_DUGJA | GTAGAGCAAG | AATTGAGAAA   | CATGCGAATT  | GATGCAAGAG  | TTGGTAAAGT  | AAATACATGT  | 1476 |
| PIWI2_SCHMD | GTGGACAAG  | AATTGAGAAA   | CATGAGAATT  | GATGTCGAG   | TTGGAAGGT   | TAATACTTGT  | 1482 |
|             |            | 1,520        |             | 1,540       |             | 1,560       |      |
| PIWI2_DUGJA | GGTCCAAATG | ACGTTGAAAG   | ATGTCTAAAT  | GATGCAGCAA  | GAAGTGGGAG  | TGGATGTGCC  | 1536 |
| PIWI2_SCHMD | GGTCCAAATG | ATGTTGAAAG   | ATGTTTGAAT  | GATGCCGCTA  | GAAGTGGGAG  | TGGGTGTGCT  | 1542 |
|             |            | 1,580        |             | 1,600       |             | 1,620       |      |
| PIWI2_DUGJA | AAAATGGCAT | TAGTTTTTGT   | ACCGGATGAC  | CGAGTTTATG  | CTAAAGTTAA  | ATCTTTCACC  | 1596 |
| PIWI2_SCHMD | AAAATGGCGC | TGGTATTCGT   | CCCAGATGAT  | AGAGTATATG  | CCAAGGTGAA  | ATCATTTACC  | 1602 |
|             |            | 1,640        |             | 1,660       |             | 1,680       |      |
| PIWI2_DUGJA | ATGAGTACTG | GTCTTTTAAC   | ACAATGCGTG  | ACAACCAGAA  | ATGGGACCAA  | CAGAAACGAT  | 1656 |
| PIWI2_SCHMD | ATGAGTACTG | GTCTTTTAAC   | CCAATGTGTA  | ACAACACGTA  | ATGGTACTAA  | TAGAAACGAT  | 1662 |
|             |            | 1,700        |             | 1,720       |             | 1,740       |      |
| PIWI2_DUGJA | AAACGCAGAA | AAGTCGTTTC   | CAATAAACT   | GTATGCAAAA  | TATTTGCAAA  | ATTTGGATAC  | 1716 |
| PIWI2_SCHMD | AAACGAAGAA | AGGTGGTTTC   | AAGTAAAACC  | GTGATGCAAA  | TATTTGCAAA  | ATTCGGATAT  | 1722 |
|             |            | 1,760        |             | 1,780       |             | 1,800       |      |
| PIWI2_DUGJA | GACCCATGGA | CTGTGAAAT    | TAAATTACGA  | CCAACATGTA  | TTGTTGGCAT  | GGACACCTAC  | 1776 |
| PIWI2_SCHMD | GATCCATGGA | CAGTTGAAAT   | TAAATTGAGA  | CCAACATGTA  | TTGTCGGTAT  | GGATACCTAT  | 1782 |
|             |            | 1,820        |             | 1,840       |             | 1,860       |      |
| PIWI2_DUGJA | CATAACAAGT | CTAGTAAAAA   | GTC AATTCAA | GCATCTGTAT  | TCTCGATAAA  | CAGTACATTT  | 1836 |
| PIWI2_SCHMD | CATAACAAGT | CCAGCAAGAA   | ATCAATTCAA  | GCATCTGTAT  | TTTCGATCAA  | CAGCACATTT  | 1842 |
|             |            | 1,880        |             | 1,900       |             | 1,920       |      |
| PIWI2_DUGJA | ACGCAATATA | TGAGTTTCGT   | AAATCAA--   | CCTAAAGGTC  | GACAAGAATT  | TCATGAAACC  | 1893 |
| PIWI2_SCHMD | ACACAATATA | TGAGCTTTGT   | TGTTAATTCT  | CCTAAAGGAC  | GTCAAGGAATT | CCACGAAACT  | 1902 |
|             |            | 1,940        |             | 1,960       |             | 1,980       |      |
| PIWI2_DUGJA | TTAGGTAAAA | ATTTTAATTT   | GGCTTTAGAA  | GATTTCAAGA  | AAAGATACGA  | TATTTTGCCG  | 1953 |
| PIWI2_SCHMD | TTAGGCAAAA | ATTTCAATTT   | AGCGTTAGAA  | GATTTCAAGA  | AACGTTATGA  | CATATTTGCC  | 1962 |
|             |            | 2,000        |             | 2,020       |             | 2,040       |      |
| PIWI2_DUGJA | CAAAGAATTT | TAGTATTTTG   | AGATGGTGT   | GGTGACAATC  | AGTTGCAATT  | TACAAAGAAT  | 2013 |
| PIWI2_SCHMD | CAGCGAATTT | TAGTCTTTAG   | AGATGGTGT   | GGAGATAACC  | AAC TTCAATT | TACTAAAAAT  | 2022 |
|             |            | 2,060        |             | 2,080       |             | 2,100       |      |
| PIWI2_DUGJA | TTTGAGGTAG | ATGCTATGAA   | ACCATTGATT  | GAAAATATTT  | ATAAAAAGTAA | CGGTTTCCCG  | 2073 |
| PIWI2_SCHMD | TTTGAAGTTG | ATGCAATGAA   | ACCGCTTATT  | GAAAATATAT  | ACAAAAGGCAA | CGGATTCCCT  | 2082 |
|             |            | 2,120        |             | 2,140       |             | 2,160       |      |
| PIWI2_DUGJA | GTCCCAAAA  | TTATCTACGT   | CATCGTTAAG  | AAAAGAGTGG  | GGACTAAACT  | ATTCAACCGA  | 2133 |
| PIWI2_SCHMD | GTCCACAAA  | TCAATTTATG   | CATCGTAAAG  | AAAAGAGTGG  | GGACTAAAGT  | TTTCAACAGA  | 2142 |
|             |            | 2,180        |             | 2,200       |             | 2,220       |      |
| PIWI2_DUGJA | GGCAACAATC | CAAAATCCAGG  | AACAGTTGTC  | GATAAAGAAA  | TAGTGAAACC  | GAAC TTTTAC | 2193 |
| PIWI2_SCHMD | GGAAATAATC | CAAAATCC TGG | AACTGTTGTC  | GATAAAGAAA  | TTGTCAAACC  | GAATTTCTAT  | 2202 |
|             |            | 2,240        |             | 2,260       |             | 2,280       |      |
| PIWI2_DUGJA | GAGTTTTTCT | TGGTTTCACA   | AAGAACAACG  | AAAGGAACAG  | CAACAACCAC  | TAATTATAAT  | 2253 |
| PIWI2_SCHMD | GAATTTTTCC | TAGTTTCACA   | AAGAACAACG  | AAAGGAAC TG | CAACTCCAAC  | TAATTATAAT  | 2262 |
|             |            | 2,300        |             | 2,320       |             | 2,340       |      |
| PIWI2_DUGJA | GTTTTGGAAG | CACTCGATT    | GTTGACTAAA  | AAAGGAACAA  | TGGATCCCAT  | GGCTCCTAAT  | 2313 |
| PIWI2_SCHMD | GTTTTAGAAG | ATACTCGATT   | GCTAACGAAA  | AAAGGTACTA  | TGGATCCTAT  | GGCACCGAAT  | 2322 |
|             |            | 2,360        |             | 2,380       |             | 2,400       |      |
| PIWI2_DUGJA | GAACTGCAAA | AAATTACTTA   | CGCACTAACT  | CATTTATATT  | TCAATTGGAT  | GGGTACAATT  | 2373 |
| PIWI2_SCHMD | GAGCTGCAAA | AGATTACTTA   | TGCTCTAACT  | CATTTATATT  | TCAATTGGAT  | GGGAAC TATC | 2382 |
|             |            | 2,420        |             | 2,440       |             | 2,460       |      |
| PIWI2_DUGJA | CGTGTACCTG | TCCCTGTGCA   | TTACGCACAT  | CGATTGGCAG  | AGTTAGTGGG  | AAAAGTTCAC  | 2433 |
| PIWI2_SCHMD | CGAGTTCGGG | TTCCAGTGCA   | TTATGCGCAT  | AGATTGGCTG  | AATTAGTTGG  | AAAGGTGCAT  | 2442 |
|             |            | 2,480        |             | 2,500       |             | 2,520       |      |
| PIWI2_DUGJA | AAAGGAAATA | GTCC TGCTGT  | AATCAATGAA  | AGAATCAGGA  | ACAGGCTTTT  | CTATTTATAA  | 2493 |
| PIWI2_SCHMD | AAGGGCTCTA | ATCCCGTTGC   | CATTAATGAA  | AGAATAAGAA  | ATAGGCTCTT  | CTATTTATAA  | 2502 |
